# Supplementary material for: Genome-Wide Association Study on Adiponectin-Mediated Suppression of HDL-C Levels in Taiwanese Individuals Identifies Functional Haplotypes in CDH13
Source: MDPI journal article supplement (doi:10.3390/genes12101582), 2021-10-07
Supplement: s1 [file s1]

**Supplementary Figure S1. A conceptual model for mediation analysis**

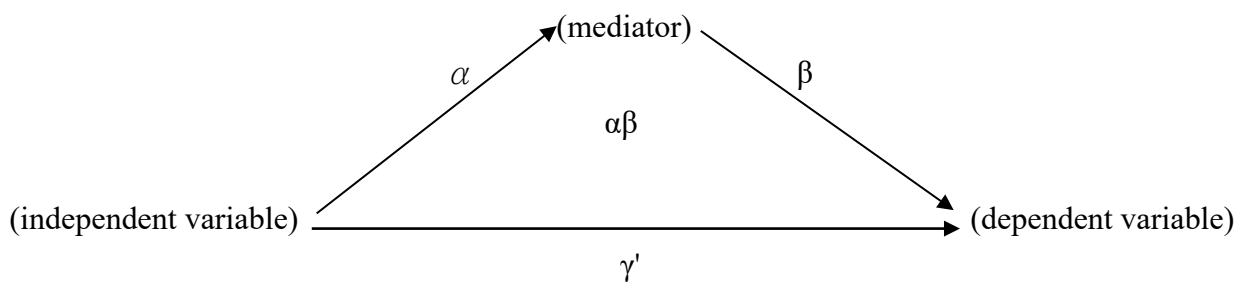

$\alpha$  : unstandardized coefficient for the association between independent variable and mediator.

$\beta$  : unstandardized coefficient for the association between mediator and dependent variable (when adjusting for independent variable.)

Mediation (indirect) effect =  $\alpha\beta$  ; Direct effect =  $\gamma'$ ; Total effect =  $\alpha\beta + \gamma'$
